# Supplementary material for: Insight into Carbohydrate Metabolism and Signaling in Grapevine Buds during Dormancy Progression
Source: MDPI journal article supplement (doi:10.3390/plants11081027), 2022-04-09
Supplement: s1 [file s1]

**Table S1.** List of primers used for qPCR analysis. *VvMSA* = Maturation, Stress, ABA; *VvHT1* = Hexose Transporter 1; *VvHT5* = Hexose Transporter 5; *VvRS* = Raffinose Synthase.

| Gene target                  |   | Primer sequence (5'-3') | Accession     |
|------------------------------|---|-------------------------|---------------|
| <i>VvHT5</i> <sup>[7]</sup>  | F | CTTTCCATGCTTTGCCATTT    | Vitvi05g00468 |
|                              | R | ACCAATGCTTCTTCCACACC    |               |
| <i>VvHT1</i> <sup>[35]</sup> | F | TCAACGATGGTTCTTACAGC    | Vitvi10g00358 |
|                              | R | AACCGATAGTATTGTATTCTG   |               |
| <i>VvINV</i> <sup>[42]</sup> | F | GCAGCAGAAATGGGGTTGAA    | Vitvi04g00094 |
|                              | R | AGGTATCGGTTTCAGGCACA    |               |
| <i>VvMSA</i> <sup>[43]</sup> | F | GCATGTGTGCTTGTGTGTAA    | Vitvi18g02973 |
|                              | R | TCACAAGGACACACAGAGAGA   |               |
| <i>VvRS</i>                  | F | CTCTCCCGGGGAAATCTGTT    | Vitvi14g01717 |
|                              | R | GATCTTGGTTTCTCGGCTGC    |               |

**Table S2.** Results of statistical analysis performed separately for each sugar.

|          | Glucose   | Fructose   | Sucrose   | Raffinose  |
|----------|-----------|------------|-----------|------------|
| Oct 22nd | <i>c</i>  | <i>d</i>   | <i>b</i>  | <i>bcd</i> |
| Nov 11th | <i>c</i>  | <i>cd</i>  | <i>b</i>  | <i>ab</i>  |
| Nov 25th | <i>c</i>  | <i>d</i>   | <i>b</i>  | <i>bcd</i> |
| Dec 15th | <i>a</i>  | <i>a</i>   | <i>a</i>  | <i>a</i>   |
| Dec 29th | <i>ab</i> | <i>ab</i>  | <i>ab</i> | <i>abc</i> |
| Jan 9th  | <i>bc</i> | <i>abc</i> | <i>b</i>  | <i>d</i>   |
| Jan 23rd | <i>c</i>  | <i>bcd</i> | <i>b</i>  | <i>d</i>   |
| Feb 11th | <i>bc</i> | <i>bc</i>  | <i>ab</i> | <i>bcd</i> |
| Feb 25th | <i>c</i>  | <i>bcd</i> | <i>b</i>  | <i>cd</i>  |
| Mar 10th | <i>c</i>  | <i>bcd</i> | <i>ab</i> | <i>cd</i>  |
